# Supplementary material for: Modeling of the synergistic anti-reflection effect in gradient refractive index films integrated with subwavelength structures for photothermal conversion
Source: Royal Society of Chemistry journal article supplement (doi:10.1039/d4cp00527a), 2024-01-01
Supplement: d4cp00527a1.pdf [file d4cp00527a1.pdf]

## Supplementary material

### **Modeling of the synergistic anti-reflection effect in gradient refractive index films integrated with subwavelength structures for photothermal conversion**

Yixuan Wang<sup>1</sup>, Jingxu Shi<sup>1</sup>, Xiangjun Liu<sup>1</sup>, Bing Chen<sup>1\*</sup>, Xiangfu Wang<sup>1,2\*</sup>

*<sup>1</sup>College of Electronic and Optical Engineering & College of Flexible Electronics (Future Technology), Nanjing University of Posts and Telecommunications, Nanjing, 210023, China*

*<sup>2</sup>The State Key Laboratory of Refractories and Metallurgy (Wuhan University of Science and Technology), Wuhan, 430081, China*

\*Corresponding authors

E-mail address: bchen@njupt.edu.cn (B. C.); xfwang@njupt.edu.cn (X. W.).

The three-layer structure of GRITCs based on PU/MCS (surface refractive index  $n_s = 2.35$ )<sup>1</sup> with the optimized SNA is designed.

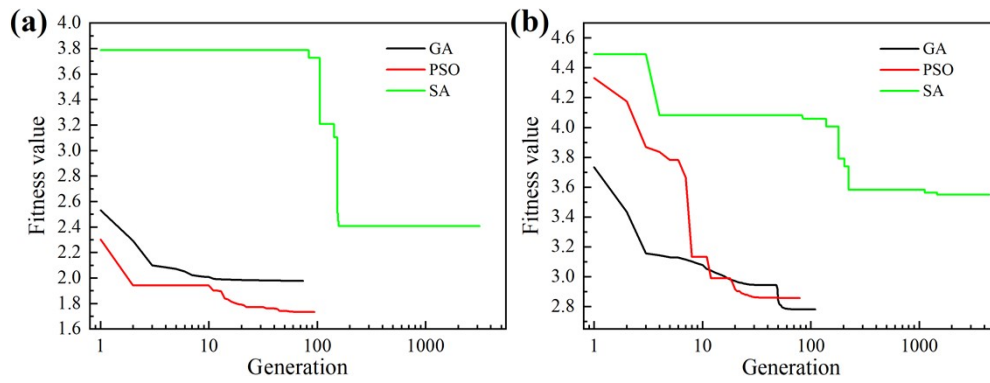

**Fig. S1** (PU/MCS as substrate) The convergence curves of GA, PSO, and SA with (a)  $R_{ave}$  or (b)  $R_{w-ave}$  as the fitness function.

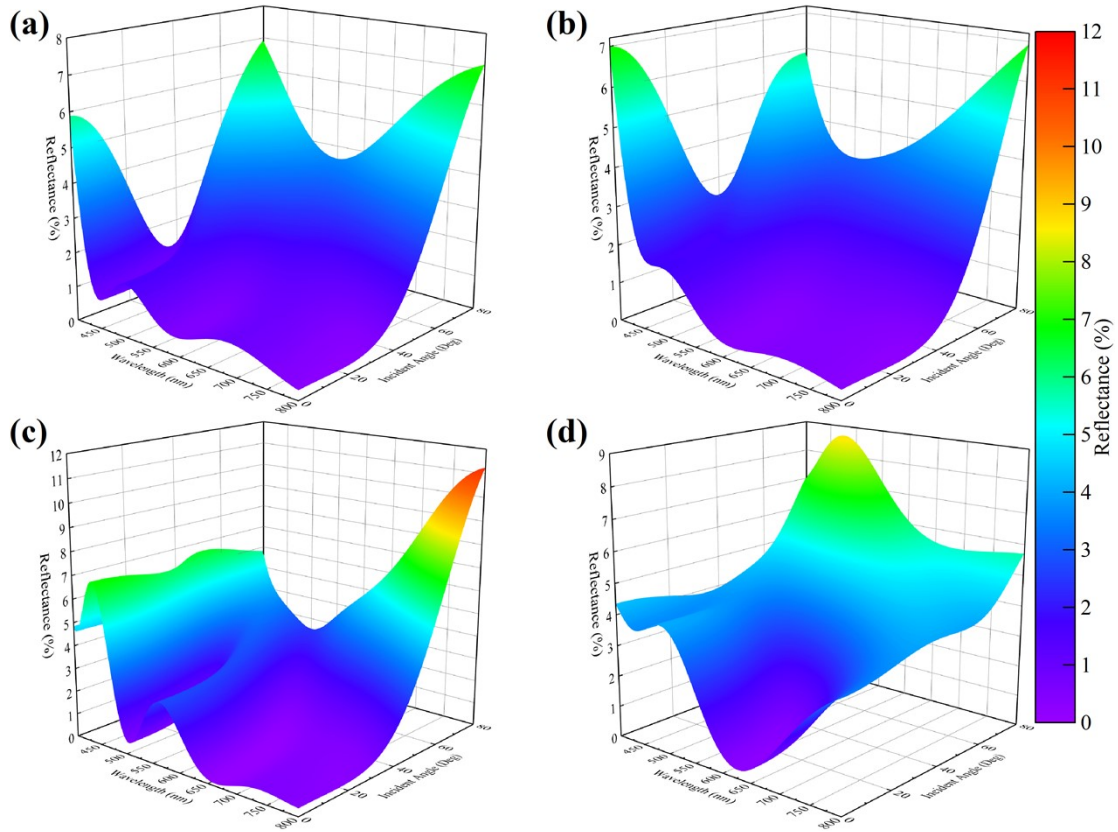

**Fig. S2** (PU/MCS as substrate) Reflectance characteristics of the structures individually optimized by (a) GA, (b) PSO, (c) SA, and (d) QID, with  $R_{ave}$  as the objective function, for wavelengths from 400 to 800 nm and incident angles from  $0^\circ$  to  $80^\circ$ .

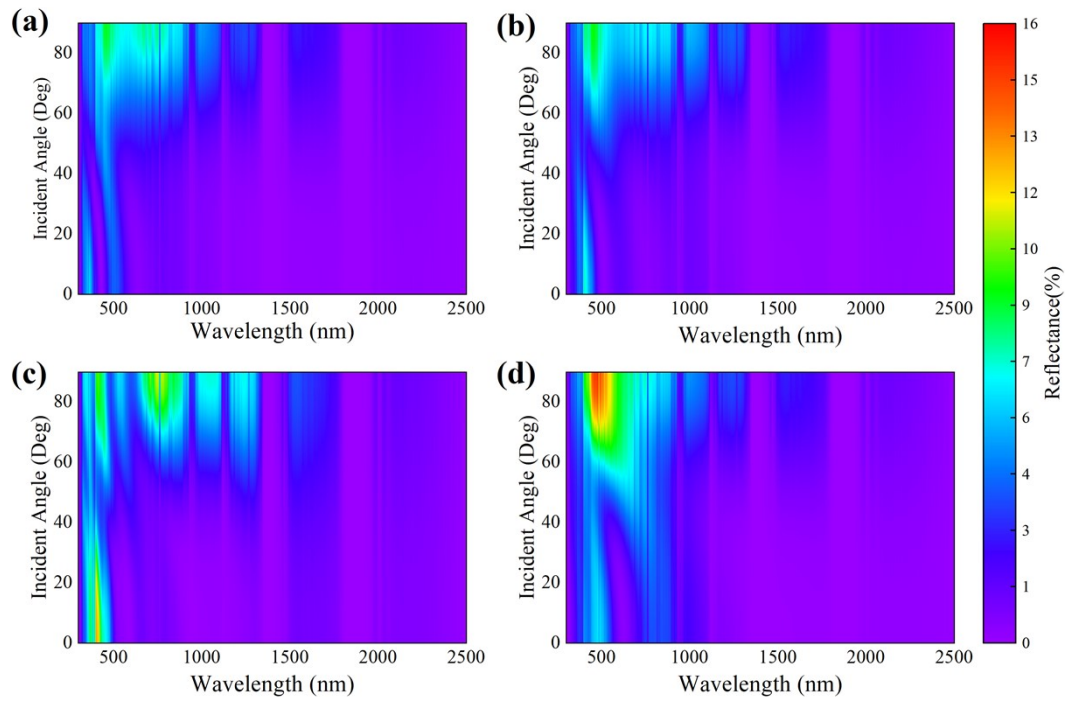

**Fig. S3** (PU/MCS as substrate) Reflectance characteristics of the structures individually optimized by (a) GA, (b) PSO, (c) SA, and (d) QID, with  $R_{w-ave}$  as the objective function, for wavelengths from 300 to 2500 nm over the full angle of incidence.

The three-layer structure of GRITCs based on CFs/CNTs (surface refractive index  $n_s = 2.7$ )<sup>2</sup> with the optimized SNA is designed.

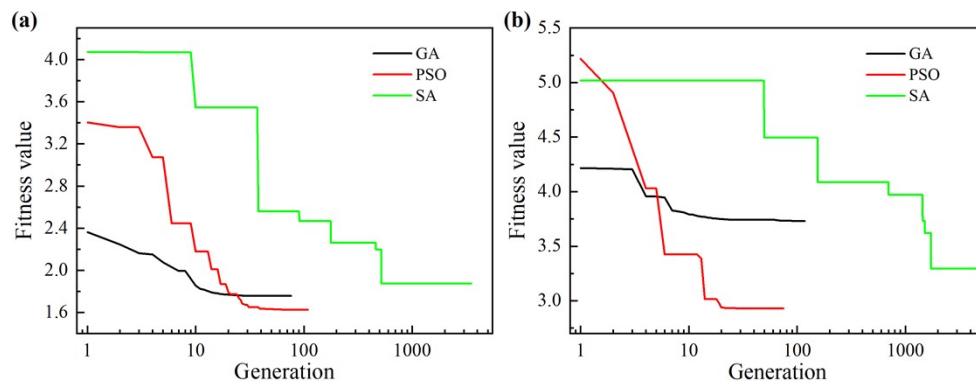

**Fig. S4** (CFs/CNTs as substrate) The convergence curves of GA, PSO, and SA with (a)  $R_{ave}$  or (b)  $R_{w-ave}$  as the fitness function.

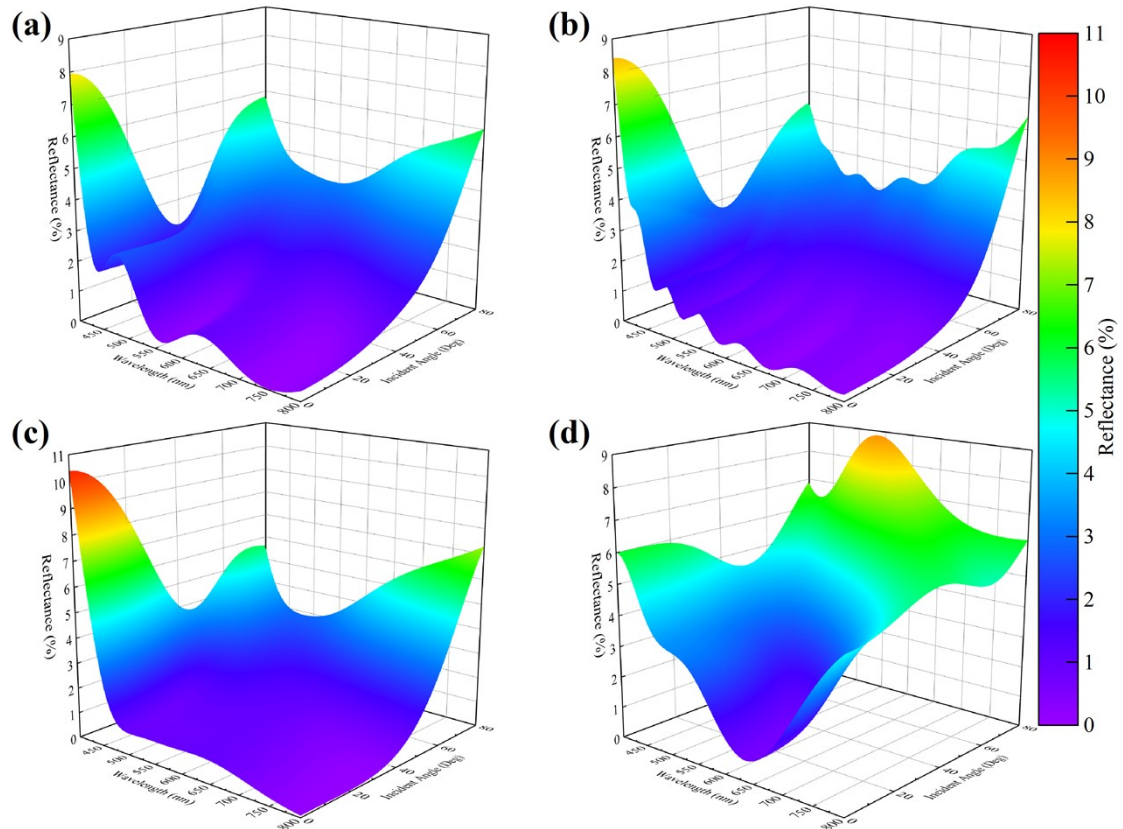

**Fig. S5** (CFs/CNTs as substrate) Reflectance characteristics of the structures individually optimized by (a) GA, (b) PSO, (c) SA, and (d) QID, with  $R_{ave}$  as the objective function, for wavelengths from 400 to 800 nm and incident angles from  $0^\circ$  to  $80^\circ$ .

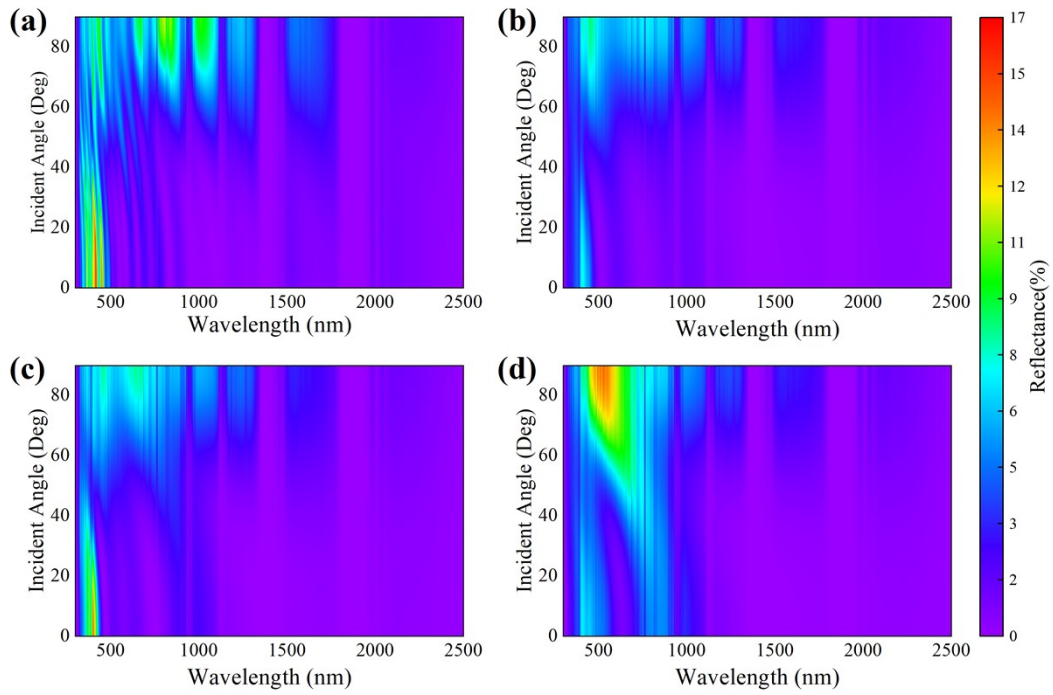

**Fig. S6** (CFs/CNTs as substrate) Reflectance characteristics of the structures individually optimized by (a) GA, (b) PSO, (c) SA, and (d) QID, with  $R_{w-ave}$  as the objective function, for wavelengths from 300 to 2500 nm over the full angle of incidence.

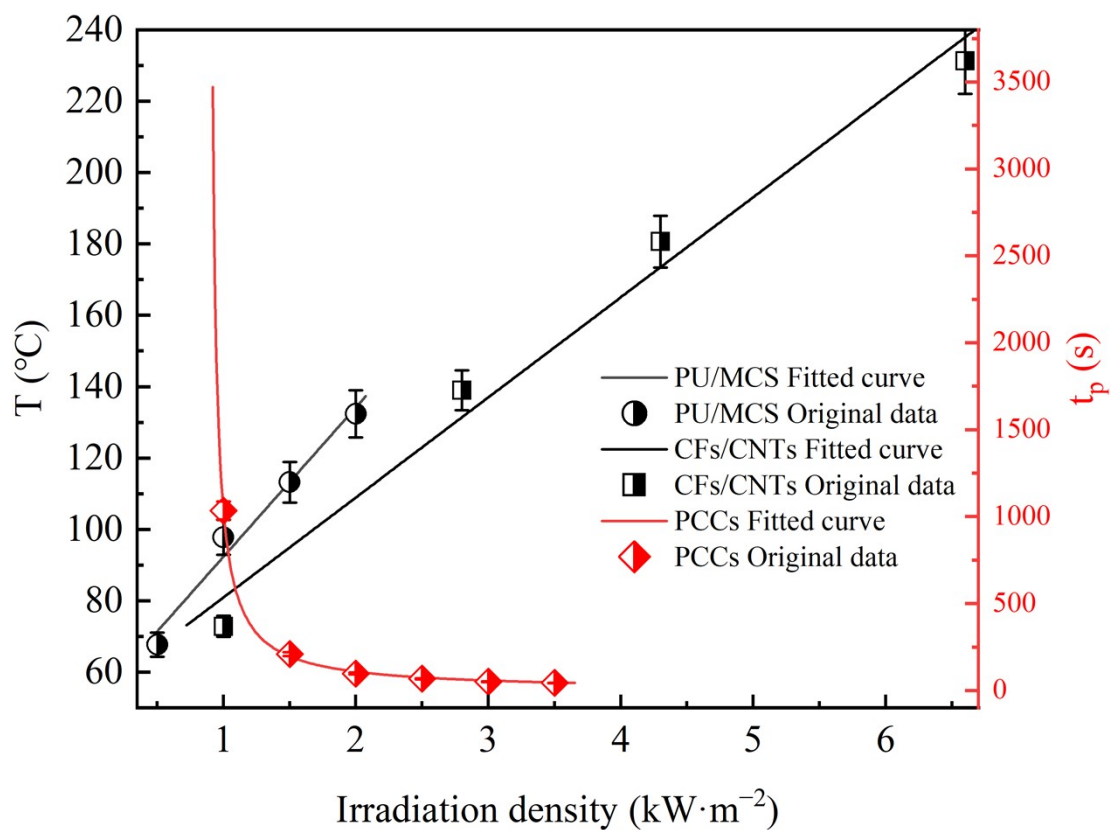

**Fig. S7** Fitted curves of the main parameters of the three photothermal conversion materials as a function of irradiation density.



## References

- [1] Y. Zhang, Z. Qiang and B. D. Vogt, *RSC Adv.*, 2014, **4**, 44858-44867.
- [2] T. Nishihara, A. Takakura, M. Shimasaki, K. Matsuda, T. Tanaka, H. Kataura and Y. Miyauchi, *Nanophotonics*, 2022, **11**, 1011-1020.
